# Supplementary material
Source: Elsevier journal article supplement (https://www.sciencedirect.com/science/article/pii/S2173505019300020)
Supplement: mmc1 [file S2173505019300020:mmc1.docx]

**Supplementary Material**

**Pearson correlations between cytokines and clinical dimensions / cognitive domains**

|  | **IL-2** (pg/mL) | **IL-1β**(pg/mL) |
| --- | --- | --- |
|  | SZ (n=73) | SZ (n=73) |
| *Subgroups:* | FEP (n=44) / ECS(n=29) | FEP (n=44) / ECS(n=29) |
| PANSS Total score | **0.345****  **0.395**** / NS | **0.375****  **0.400**** / NS |
| Positive | 0.241*  NS / 0.399* | 0.251*  NS / **0.501**** |
| Negative | 0.268*  **0.438**** / NS | **0.337****  **0.529**** / NS |
| Marder Negative Factor | **0.315****  **0.426**** / NS | **0.386****  **0.514****/ NS |
| General | **0.315****  0.329* / NS | **0.314****  NS / NS |
| CAINS scores |  |  |
| CAINS - MAP | **0.341****  0.388* / NS | 0.241*  0.332* / NS |
| CAINS - EXP | NS  0.308* / NS | 0.284*  **0.497**/** NS |
| CDS score | 0.259*  NS / **0.557**** | NS |
| PSP score | **-0.448****  **-0.542**** / NS | **-0.392****  **-0.404**** / -0.379* |
| *MCCB cognitive domains (T-scorea):* | |  |
| Speed of processing | NS  -0.357* / NS | NS |
| Attention and vigilance | NS | NS  NS / 0.470* |
| Working memory | NS  -0.324*/ NS | NS  -0.347* / NS |
| Visual learning | NS  **-0.423**** / NS | NS  -0.331* / NS |
| Social cognition | NS  - 0.374* / NS | NS |

Only correlations with p < 0.05 * and p < 0.01 ** are shown. NS = p ≥ 0.05; FEP, First-episode of psychosis (0-5 years of illness); ECS, Early chronic stage (6-10 years); PANSS, Positive and Negative Syndrome Scale; CAINS, Clinical Assessment Interview for Negative Syndrome; MAP, Motivation and Pleasure; EXP, Expression; CDS, Calgary Depression Scale; PSP, Personal and Social Performance Scale; MCCB, MATRICS Consensus Cognitive Battery. No associations were detected for other cytokines.
